1 **Feammox *Acidimicrobiaceae* bacterium A6, a lithoautotrophic electrode-colonizing**  
2 **bacterium**

3 Melany Ruiz-Urigüen<sup>1\*</sup>, Weitao Shuai<sup>1\*</sup>, Peter R. Jaffé<sup>1#</sup>

4 <sup>1</sup> Department of Civil and Environmental Engineering, Princeton University, USA, New Jersey,  
5 Princeton, USA

6  
7 \* Authors contributed equally to this manuscript.

8 # Corresponding author, jaffe@princeton.edu, + 1 609 258 4653

9 Running title: Electrode colonizer *Acidimicrobiaceae* bacterium A6

10

11 Keywords: *Acidimicrobiaceae* bacterium A6, Actinobacteria, Feammox, electrode-reducing  
12 bacteria, ammonium oxidation, iron reduction, anaerobic, lithoautotrophic, wetland soils.

13

14 **ABSTRACT**

15 An *Acidimicrobiaceae* bacterium A6 (A6), from the Actinobacteria phylum was recently  
16 identified as a microorganism that can carry out anaerobic ammonium oxidation coupled to iron  
17 reduction, a process also known as Feammox. Being an iron-reducing bacterium, A6 was studied  
18 as a potential electrode-reducing bacterium that may transfer electrons extracellularly onto  
19 electrodes while gaining energy from ammonium oxidation. Actinobacteria species have been  
20 overlooked as electrogenic bacteria, and the importance of lithoautotrophic iron-reducers as  
21 electrode-reducing bacteria at anodes has not been addressed. By installing electrodes in soil of a

22 forested riparian wetland where A6 thrives, as well as in A6 bioaugmented constructed wetland  
23 (CW) mesocosms, characteristics and performances of this organism as an electrode-reducing  
24 bacterium candidate were investigated. In this study, we show that *Acidimicrobiaceae* bacterium  
25 A6 is a lithoautotrophic bacterium, capable of colonizing electrodes in the field as well as in CW  
26 mesocosms, and that it appears to be an electrode-reducing bacterium since there was a boost in  
27 current production shortly after the CWs were seeded with *Acidimicrobiaceae* bacterium A6.

## 28 **IMPORTANCE**

29 Most studies on electrogenic microorganisms have focused on the most abundant  
30 heterotrophs, while other microorganisms also commonly present in electrode microbial  
31 communities such as Actinobacteria have been overlooked. The novel *Acidimicrobiaceae*  
32 bacterium A6 (Actinobacteria) is an iron-reducing bacterium that can colonize the surface of  
33 anodes and is linked to electrical current production, making it an electrode-reducing candidate.  
34 Furthermore, A6 can carry out anaerobic ammonium oxidation coupled to iron reduction,  
35 therefore, findings from this study open up the possibility of using electrodes instead of iron as  
36 electron acceptors as a mean to promote A6 to treat ammonium containing wastewater more  
37 efficiently. Altogether, this study expands our knowledge on electrogenic bacteria and opens up  
38 the possibility to develop Feammox based technologies coupled to bioelectric systems for the  
39 treatment  $\text{NH}_4^+$  and other contaminants in anoxic systems.

## 40 INTRODUCTION

41 Electrode-reducing bacteria (ERB) are part of a group of electrogenic microorganisms that  
42 have the ability to extract energy from different types of electron donors such as organic matter,  
43 and transfer those electrons to various terminal electron acceptors including electrodes operating  
44 as anodes, in which case a low-density electrical current is produced (1). Known electrogenic  
45 microorganisms include yeast and various bacteria (2). Studies on community composition  
46 analysis of ERB show ample taxonomic diversity mostly dominated by three phyla, Firmicutes,  
47 Acidobacteria, and Proteobacteria, the latter contains some of the most commonly present and  
48 extensively studied ERB: *Geobacter spp.* and *Shewanella spp.* (1-4). Most of these organisms are  
49 heterotrophs that thrive in anaerobic environments and obtain their energy by oxidizing organic  
50 matter (1). Commonly, ERB are iron-reducing bacteria (FeRB) (1), and many depend on or  
51 benefit from electron shuttles to facilitate the transfer of electrons from the microorganism to a  
52 solid electron acceptor such as the iron oxides [Fe(III)] (5).

53 *Acidimicrobiaceae* bacterium A6 (referred to as A6 from here on) is an autotrophic  
54 anaerobic microorganism that obtains its energy by oxidizing ammonium ( $\text{NH}_4^+$ ) to nitrite ( $\text{NO}_2^-$ )  
55 and transferring the electrons to oxidized iron [Fe(III)], which acts as the final electron acceptor  
56 under environmental conditions (6, 7) in a process known as Feammox (8-10). Similarly to other  
57 metal reducing bacteria, *Acidimicrobiaceae* bacterium A6, a type of Actinobacteria, has the  
58 ability to use other sources of electron acceptors (11). The Actinobacteria phylum is commonly  
59 present in microbial community composition analysis of biomass associated to electrodes (12-  
60 17), but its role on the electrodes is rarely analyzed, most likely because it is not amongst the  
61 most abundant. To the best of our knowledge, to this date, there is only one report of an  
62 electrogenic Actinobacteria, genus *Dietzia*, a heterotrophic bacteria isolated from an intertidal

63 zone at the Río de la Plata River (18). A6 is an iron reducer (7) that can use AQDS  
64 (anthraquinone-2,6-disulfonate), a humic acid analogue, as electron shuttle (10). Therefore, these  
65 A6's characteristics opened up the possibility of it also being an ERB.

66 Lithoautotrophs are microorganisms that use inorganic compounds for their energy source  
67 and CO<sub>2</sub> as their carbon source. This type of microorganisms are usually studied as part of the  
68 communities that develop at the cathode because they can be electrotrophs, i.e. they can uptake  
69 electrons directly from the cathode as their energy source, and they thrive on the CO<sub>2</sub> formed by  
70 the oxidation of organic matter by the ERB (19, 20). The microbial communities that develop at  
71 the cathode are as highly diverse as the communities that develop at the anode, and much of the  
72 microbial groups found at the anode as ERB have also been found at the cathode (17, 21), some  
73 of them as proven electrotrophs, including *Geobacter* species (20, 22). Among the phyla present  
74 on both, anode and cathode, one can usually find Actinobacteria.

75 Microbial fuel cells (MFCs) and microbial electrolysis cells (MECs) are two reactor  
76 configurations that utilize electrogenetic microorganisms for renewable energy production,  
77 bioelectricity generation and pollutant degradation. In particular, MFCs coupled to constructed  
78 wetlands (CWs) have been used as devices to explore the possibility of treating wastewater and  
79 producing electricity simultaneously (23, 24). By incorporating MFCs in planted constructed  
80 wetlands, MFC operation can be promoted by the oxygen excreted by plant roots (25), resulting  
81 in stratified redox conditions that develop in wetland soils (26).

82 Given that the Feammox process has been found in multiple submerged sediments (7, 8, 27-  
83 29) and that A6 was isolated from wetland sediments (30), studying it in the field and in CW is  
84 advantageous to understand and characterize this bacterium. In this study, electrodes were  
85 installed in multiple locations of a forested riparian wetland as well as in laboratory CW

86 mesocosm to investigate A6 as a potential ERB. The field locations provide insightful  
87 information regarding A6's natural and electrode-enhanced thriving conditions, whereas the  
88 MFCs coupled CW mesocosms make controlled conditions available to better understand the  
89 field findings.

90 The objectives of this study were to (i) investigate if *Acidimicrobiaceae* bacterium A6 could  
91 colonize electrodes placed into sediments of a location where *Acidimicrobiaceae* bacterium A6  
92 has been previously detected, and thus enhance its number with respect to the surrounding  
93 population, and (ii) to analyze its ability to transfer electrons to an electrode by determining  
94 current increments in CWs with embedded electrodes in response to bioaugmentation with  
95 *Acidimicrobiaceae* bacterium A6. These findings expand the knowledge of the diversity of ERB  
96 by including a member of the previously overlooked Actinobacteria, and allow for the possibility  
97 of practical applications for *Acidimicrobiaceae* bacterium A6 for the treatment of  $\text{NH}_4^+$   
98 contamination in anoxic systems using electrodes as stable, long-term terminal electron acceptors.

## 99 **RESULTS**

### 100 ***Acidimicrobiaceae* bacterium A6 quantification.**

#### 101 *A6 quantification in the field study*

102 Bacterial count by qPCR confirmed our initial hypothesis that the number of the A6's  
103 population could be enhanced on the electrodes' surface because the bacteria may have the  
104 ability to use electrodes as electron acceptors in the same manner that other FeRB do. The  
105 average count of A6 on the electrode's biofilm was orders of magnitude higher than the average  
106 count of the bacterium in the soil (5.21E+7 copies of DNA/m<sup>2</sup> on the electrode vs 2.33E+3  
107 copies of DNA/m<sup>2</sup> in the soil). Furthermore, in order to confirm that the electrodes were also

108 being colonized by other electrogenic bacteria, we choose to quantify the genus *Geobacter*,  
109 which has become a model organism for the study of electrogenic bacteria. Both organisms, A6  
110 and *Geobacter* spp., had significant higher populations on the biofilm formed on the electrodes  
111 surface than on the surrounding soil (Figure 1) (Welch t-test,  $p < 0.05$  for A6 and  $p < 0.001$  for  
112 *Geobacter*). On average, across all sites, the biofilm quantification for A6 and *Geobacter*  
113 resulted in ~4 orders of magnitude higher bacterial counts on the electrodes than on the  
114 surrounding soil (Table 1), which indicates that the number of A6 was clearly enhanced by the  
115 electrodes. However, we could not always see a trend in biomass being higher at the deeper  
116 electrodes than on the shallow electrodes as initially hypothesized. We had initially assumed that  
117 the surroundings of the shallow electrode would be the more oxidized, thus acting as the cathode,  
118 and the deeper the more reduced, hence acting as an anode. Nonetheless, because the electrodes  
119 were placed in the field for 52 days without any interference, during which 19 days of rain were  
120 recorded with a monthly average precipitation of 42 mm in June and 144 mm in July 2016  
121 (Figure S1), the redox state of the soils could have shifted, thus inverting the polarity of the  
122 electrodes due to the fluctuation in the water table. Such conditions could have favored the  
123 colonization of electrode-reducing bacteria on both electrodes, the deep as well as on the shallow  
124 ones at different times. Furthermore, two current measurements were taken in the field between  
125 the deep and shallow electrodes of each set, on the first and final day. For set 1, current increased  
126 from 0.40 to 40.45  $\mu\text{Amps}$ , set 2 from 0.10 to 0.40  $\mu\text{Amps}$ , set 3 from 0 to 2  $\mu\text{Amps}$ , and set 4  
127 from 0.50 to 0.75  $\mu\text{Amps}$ . For Site 5-6, current measured on set 5 decreased from 7 to 0.66  
128  $\mu\text{Amps}$ , and set 6 inverted its current from 8 to -0.50  $\mu\text{Amps}$ , thus indicating that electrode  
129 polarity could have inverted during the time when the electrodes were in the field. Therefore, the

130 redox potential profile in each of the CWs was continuously monitored to establish which  
131 electrodes were working as the cathodes and as the anodes.

### 132 *A6 quantification in the CW mesocosm study*

133 The population of A6 (copies of DNA / m<sup>2</sup>) is shown in Figure 2 for all samples from both  
134 CW mesocosms. The A6 population is higher in the high Fe mesocosm than in the low Fe  
135 mesocosm either on the CW sediments or on electrode biofilms ( $p < 0.05$ ). Furthermore, the A6  
136 population on the electrode biofilms is always 2 – 3 orders of magnitude higher than in their  
137 surrounding sediments for the deeper electrodes (depth > 15 cm) in both mesocosms.

138 Electrode 1 (at depth = 6 cm) was designated as cathode at the beginning, but as the redox  
139 potential profile in the CW developed, the direction of current between the electrode 1 and  
140 electrode 2 (at depth = 12 cm) reversed around day 35. Hence, on day 59 electrode 2 was  
141 designated as cathode and the wires were reconnected to form electrode pairs between electrode  
142 2 and other electrodes. Figure S2 shows that the ORP at the location of electrode 2 was the  
143 highest before the injection of A6 enrichment culture. As the electrodes below 15 cm (electrodes  
144 3 – 5) had lower oxidation-reduction potential through the entire experiment, those electrodes  
145 always operated as the anodes. The tendency of A6 colonization was observed on the anodes (for  
146 A6 count on electrode vs. in soil at depth > 15 cm,  $p < 0.05$ ) whereas the two shallower  
147 electrodes, which each operated as cathodes for a certain period, did not always show larger  
148 numbers of A6 on these electrodes compared to the surrounding soil, and no statistically  
149 significant difference in the count number between those samples was found (for A6 count on  
150 electrode vs. in soil at depth < 15 cm,  $p > 0.05$ ). These results confirm the higher affinity of A6  
151 for the electrode (anode) that remained in the more reduced soil throughout the experiment over

152 the electrode (cathode) in the more oxidized soil. The well-controlled and monitored CW  
153 mesocosms were able to provide insights that were not clearly resolved by the field studies.

#### 154 **Phylogenetic analyses and microbial community structure.**

155 The phylogenetic diversity at the phylum level found in the biofilm and soil samples taken  
156 from the field as well as the CW mesocosms studies (Figure 3) show that Proteobacteria and  
157 Acidobacteria represent on average more than 70% of the diversity found in all samples,  
158 followed in abundance by Chloroflexi and Bacteroidetes in the field study, and Firmicutes and  
159 Bacteroidetes in the CW mesocosm study. These highly abundant groups make up more than 80%  
160 of the population found in all samples. All these phyla are commonly found in soil and in  
161 bioelectrochemical systems due to their ERB ability (12, 13, 31, 32), therefore, they are common  
162 subjects of study. Actinobacteria, the phylum to which *Acidimicrobiaceae* bacterium A6 belongs  
163 to, represents as little as 2, 4, 5 and 3.5 % of the relative abundance found at the three different  
164 sites and CW mesocosms respectively. Nonetheless, Actinobacteria ranks in the top 5 most  
165 abundant phyla found in each field site and the CW mesocosms, and makes it to the third  
166 position for some electrode biofilm samples from the field study.

#### 167 *Field experiment phylogenetic analyses*

168 The Actinobacteria phylum contains *Acidimicrobiaceae* bacterium A6, described as an  
169 unidentified *Acidimicrobiales* at the genus level in the samples from the field sites, because its  
170 16s rDNA sequence was not available in the public data bases at the time of the field study. The  
171 OTU annotated as unidentified *Acidomicrobiales* had  $\geq 97$  % sequence identity with A6, thus  
172 confirming the presence of this Feammox bacterium in our samples. A total of 316 genera were  
173 annotated in the phylogenetic analysis, however, between 51% (site 1-2) to as much as 69% (site



174 5-6) of the OTUs could not be classified at this level, thus, they were added to the “others”  
175 category. Among the top 100 most abundant genera, the unidentified *Acidomicrobiales* ranked  
176 56<sup>th</sup> (Figure 4). The genera with the highest relative abundance at site 1-2, characterized by its  
177 waterlogged condition, were *Sideroxydans* (Proteobacteria), an Fe(II) oxidizer (33), and *Geothrix*  
178 (Acidobacteria), a known ERB (34). At sites 3-4 and 5-6, the most relative abundant genera were  
179 the *Bryobacter* (Acidobacteria) an aerobic heterotroph, *candidatus\_Solibacter* (Acidobacteria),  
180 *Acidibacter* (Proteobacteria) an FeRB, the autotroph *Acidothermus* (Actinobacteria), and  
181 *Sorangium* (Proteobacteria). Other Fe cycling bacteria found among the top 100 most abundant  
182 genera are *Acidiferrobacter*, *Anaeromyxobacter*, *Ferritrophicum*, *Geobacter*, *Gallionella*,  
183 *Desulfobulbus*, and *Georgfuchsia*, all from the Proteobacteria phylum.

#### 184 *CW mesocosm phylogenetic analyses*

185 A6 was identified in the CW sediments and electrode biofilms, and A6 ranked 89th on  
186 average for all (soil and electrode biofilm) CW mesocosm samples among the top 300 genera.  
187 Unclassified OTUs comprised 26.3 – 51.6 % of the total sequences for CW soil samples and 17.4  
188 – 49.5 % of the total sequences for electrode biofilm samples. The two genera with the highest  
189 relative abundance in the CW mesocosms for all (soil and electrode biofilm) samples were  
190 *Thiomonas* and *Burkholderia*, both are Proteobacteria. In the CW soil samples the third most  
191 abundant genus was *Telmatobacter* (Acidobacteria), a group of anaerobes and chemo-  
192 organotrophs, while in the CW electrode biofilm samples the third most abundant genus was  
193 *Geobacter* (Proteobacteria).

194 The relative abundance of A6 in all CW samples is about 0.1 – 12.8 % of *Geobacter spp.*,  
195 which can be enriched on the anodes (3). Although A6 are not as abundant as *Geobacter spp.*

196 (Figure S3) in the CW mesocosms, their population was still enriched on the anodes compared to  
197 the surrounding sediments (Figure 2). In addition to *Geobacter*, 10 other genera that include  
198 known electrogenic bacteria species were also detected in all CW mesocosm samples among the  
199 top 100 genera, including *Geothrix*, *Desulfobulbus*, *Desulfovibrio*, *Pseudomonas*, *Clostridium*  
200 (2), *Desulfotomaculum* (35), *Enterobacter* (36), *Bacillus*, *Rhizomicrobium* (37) and  
201 *Anaeromyxobacter* (31). Most of the mentioned electrogenic bacteria are more abundant in the  
202 electrode's biofilms than in the nearby soil samples (paired two sample t-test,  $p < 0.05$ ; Table S3).  
203 In fact, the electrogenic bacteria form a substantial portion of the microbial community from the  
204 CW mesocosm samples, making up 3.0 – 8.5 % of the total sequences for the CW soil samples  
205 and 4.5 – 14.4 % for CW electrode biofilm samples. Those electrogenic bacteria that are  
206 enriched on electrodes compared to the nearby soil are all much more abundant than A6,  
207 resulting in lower relative abundance of A6 on the electrode biofilms compared to the nearby soil,  
208 even though the numbers of A6 are higher on the electrodes than the soil.

### 209 **Current pulse after the injection of A6 enrichment culture into the CWs**

210 Though the high and low Fe level CW mesocosms had similar current profiles before the  
211 injection of the A6 enrichment culture, the current profiles right after the injection showed a  
212 noticeable difference (Figure 5). The electrical current between electrode pairs in the low Fe CW  
213 mesocosms increased after five days following the A6 enrichment culture injection, and then  
214 descended to the previous level after 50 days. However, currents between electrode pairs in the  
215 high Fe CW mesocosms remained within a similar range as prior to the A6 enrichment culture  
216 injection, and then decreased at around the same time when the pulse in current in the low Fe  
217 CW mesocosm disappeared. The different responses indicate that more electrons were

218 transferred through the electrode pairs in the low Fe mesocosm than in high Fe mesocosm as the  
219 same amount of bacterium A6 was introduced into both mesocosms.

220 It should be noted that the samples for DNA extraction were taken almost four months after  
221 the injection of A6 and three months after the current pulse disappeared in the low Fe mesocosm.  
222 Therefore, phylogenetic results and A6 numbers discussed above may not properly capture the  
223 microbial community at the time of the pulse in the current.

## 224 **DISCUSSION**

### 225 **A6 colonization and electron transfer to electrodes**

226 The number of A6 quantified on the biofilm formed on the electrodes confirmed the  
227 hypothesis that this bacterium is able to colonize electrodes to use them as an alternative electron  
228 acceptor to Fe(III), thus enhancing its number compared to its surroundings (Figure 1). The CW  
229 permitted us to establish A6's preference over the electrodes in the more reduced soil (anodes)  
230 than over the rest of the environment (Figure 2). The consistent trend of A6 enrichment on  
231 electrodes was found on the anodes compared to surrounding sediments but not always on the  
232 electrodes that have been operated for a time period as cathodes (electrode 1 and 2 in the CW).  
233 This indicates that A6 is able to colonize and be enriched on the surface of anodes.

234 It is interesting to note that injection of A6 into the low Fe CW resulted in a pulse in current  
235 while this was not observed in the high Fe CW. This indicates that when little bioavailable Fe was  
236 present, A6 showed a more immediate affinity to colonize and transfer electrons to the electrodes.  
237 The decrease in the current after about 50 days of the injection indicates that A6 numbers or  
238 activity on the electrodes in the low Fe CW decreased over time after the injection.

## 239 *Acidimicrobiaceae* bacterium A6 and other Fe-cycling bacteria

240 A6 ranked 56<sup>th</sup> in the relative abundance at the genera level in the field study samples, and  
241 much lower in the CW samples, being outranked by other FeRB, with most of which A6 showed  
242 negative correlations between their relative abundances in the field (Figure 6). This is not the  
243 case for the relative abundance with other non-metal reducing bacteria, also from field soil and  
244 electrode samples with which showed positive or no correlation ( $r = \sim 0.0$ ) (Figure S4). When  
245 only the biofilms samples' relative abundance correlations are analyzed, the correlation between  
246 A6 and *Collimonas* shifts from slight negative ( $r = -0.02$ ) to a positive correlation ( $r = 0.45$ ) ( $p >$   
247  $0.1$ ). For all the other genera, the trends of their correlations are maintained when all the data  
248 (biofilm and soil samples) is either pooled for analysis or separated by biofilm or soil samples  
249 only. This indicates, that in soils and electrode biofilms, A6 presence is negatively affected by  
250 most other Fe-cycling bacteria found in our samples. Whereas when the relative abundance of  
251 *Geobacter* is correlated with the other Fe-cycling bacteria, it shows a positive correlation with all  
252 except *Acidibacter* and *Acidiferrobacter*. These findings open up the need for further research to  
253 understand what drives these correlations and if they may indicate a competition for the electron  
254 acceptor between A6 and other FeRB.

255 The higher relative abundance of A6 in the high Fe compared to the low Fe mesocosm  
256 (Figure S3) indicates that A6's relative abundance positively responds to the increased Fe(III)  
257 level in the sediment. This positive correlation between A6 and Fe(III) has been previously  
258 reported in environmental samples (30). However, A6 and *Geobacter spp.* relative abundances  
259 are negatively correlated, with a correlation coefficient of  $-0.47$  ( $p < 0.02$ ) in field samples and -  
260  $0.38$  ( $p < 0.1$ ) in the CW (Figure 7), and this holds for both electrode biofilm samples and soil  
261 samples. This negative correlation should be taken into account when implementing A6 in

262 bioelectrochemical system such as MFC, particularly those that feed on organic carbon as the  
263 electrode donors since these are systems where bacteria such as *Geobacter spp.* thrive and could  
264 affect A6's population negatively.

265 The results from this study show that *Acidimicrobiaceae* bacterium A6's, which is an iron  
266 reducer, is capable of colonizing electrodes in the field as well as in constructed wetland  
267 mesocosms, resulting for the conditions studied, in higher cell counts on the electrodes than on  
268 the soil. Thus, *Acidimicrobiaceae* bacterium A6 is a novel anaerobic litoautotroph from the  
269 Actinobacteria phyla capable of using electrodes as its terminal electron acceptor. Altogether,  
270 this work expands the knowledge of the diversity of electrogenic microorganisms beyond the  
271 commonly studied groups and opens up the possibility for applications of this bacteria in MFCs  
272 and MECs systems. However, further research is needed to elucidate what drives the different  
273 interactions between A6 and other FeER and ERB in order to optimize its applications in  
274 bioelectrochemical systems.

## 275 **MATERIALS AND METHODS**

### 276 **Field electrodes construction and setup**

277 Electrodes consisted of graphite plates [7.5 (L) x 2.5 (W) x 0.32 cm (H)], with a surface area  
278 per face of 18.75 cm<sup>2</sup> (Grade GM-10; GraphiteStore.com Inc.). The plates were polished using  
279 sandpaper (grit type 400), sonicated to remove debris, cleaned by soaking in 1 N HCl overnight  
280 and rinsed three times in distilled water (38). Each electrode set was connected by a titanium (Ti)  
281 wire cleaned with sandpaper (ultra-corrosion-resistant Ti wire, 0.08cm in diameter, McMaster-  
282 Carr code 90455k32) by inserting the wire through two holes of size 0.08 cm drilled in each

283 graphite plate to ensure a tight connection between the wire and the graphite plates to allow for  
284 low contact resistance  $<0.5 \Omega$ . The Ti wire was long enough to allow for 10 or 30 cm separation  
285 between the graphite plates (Figure 8).

286 Two pairs of electrodes were placed at three different sites. Each pair consisted of a shallow  
287 electrode placed no deeper than 5cm into the soil, connected to another electrode with either 10  
288 cm or 30 cm separation, i.e. a total of 6 sets (Table 2) in a temperate forested riparian wetland  
289 located at Assunpink Wildlife Management Area in New Jersey, USA. This is the location where  
290 the Feammox reaction was first discovered (8), and later the Feammox bacteria A6, was  
291 identified in samples from this site (7) and isolated (10). Detailed physicochemical characteristics  
292 of the soil have been described in previous studies (8, 39). Electrodes sets 1 and 2 were placed in a  
293 fully flooded location, sets 3 to 6 were placed in a wet but unsaturated location. The electrode  
294 sets were left in the field for 52 days between June 13 and August 03, 2016.

### 295 **Field electrodes recovery and sampling.**

296 After 52 days, the electrode pairs were recovered by digging them out of the soil and placing  
297 each electrode individually in a sealed bag. All the electrodes were surrounded by soil.  
298 Furthermore, a soil sample was taken from a depth of ~20 cm from each site and placed in a  
299 sealed bag. All samples were transported to the laboratory within 2 hours and immediately stored  
300 at 4°C until processed for analysis.

301 The samples obtained from the electrodes and soil are enumerated in Table 2. To analyze  
302 the biomass attached to the electrodes, first, the loosely bound soil was removed by gently  
303 shaking the electrode. Second, duplicate samples were taken from the soil layer ( $< 2$  mm thick)  
304 still surrounding the electrode. Third, duplicate samples of the biomass formed on the electrodes'

305 surface together with some graphite were removed using a sterile cutting blade (see details in  
306 Supplemental Materials, Table S1. A). DNA was extracted from all samples and then used for  
307 determining, quantifying, and comparing their microbial composition.

### 308 **Constructed wetland mesocosms and electrodes set up**

309 Controlled conditions were required to gain further insights into the electrogenesis of A6.  
310 Therefore, electrode pairs were installed in two constructed wetland (CW) mesocosms that were  
311 operated in a growth chamber (Environmental Growth Chambers, [www.egc.com](http://www.egc.com)). The  
312 constructed wetlands were designed as continuous up-flow mesocosms with water surface above  
313 the sediment. Standard-wall PVC pipes, pipe fittings (pipe size 6, inner diameter 6 inch,  
314 McMaster-Carr code 48925K25, 4880K852 and 4880K131) were used to assemble the  
315 mesocosms. The dimension of the mesocosms and the design of sampling ports are shown in  
316 Figure 9. The inflow was injected from the bottom and an opening with 1-inch diameter was  
317 drilled for the effluent to maintain constant water levels. Along the longitudinal axis were five  
318 sampling ports, spaced 6 cm apart from each other, and lysimeters were used for pore water  
319 sampling from the CW mesocosms. Nylon meshes (70  $\mu\text{m}$  opening, opening area 33%) were  
320 placed at 15 cm and 40 cm depth to separate the root zone/non-root zone respectively. At the  
321 bottom of the mesocosms, glass beads were used as bed material to disperse the inflow evenly.  
322 The CW substrate was a mixture of ASTM standard 20-30 sand, peat moss, and wetland  
323 sediments from Assunpink Wildlife Management Area in New Jersey, USA (the same location  
324 where the field electrodes were placed) with 1: 1: 0.5 ratio (by weight).

325 To investigate if A6 could colonize the electrodes and transfer electrons onto anodes, five  
326 graphite electrodes were installed in each mesocosm at the same depths as the five sampling

327 ports. The electrodes were made of rectangular graphite rods [10.16 (L) x 1.28 (W) x 1.28 cm  
328 (H)]. The preparation of the electrodes and wires was the same as described above. Each of the  
329 four electrodes that were placed into the more reduced zones (anode) was then connected via a  
330 cleaned titanium wire to the electrode that was in the most oxidized zone (cathode) of the CW as  
331 shown in Figure 9.

332 Synthesized  $\text{Fe}_2\text{O}_3 \cdot 0.5\text{H}_2\text{O}$  (2-line ferrihydrite) was added to one of the CW mesocosms to  
333 elevate its initial Fe(III) level. A concentration of 500 mg Fe(III) / kg moist sediment was added  
334 to the high Fe CW mesocosm and mixed thoroughly with the sediments, whereas no extra Fe(III)  
335 source was added to the low Fe CW mesocosm sediment. The method for synthesizing 2-line  
336 ferrihydrite was modified from Schwertmann and Cornell (2000) (40). After blending substrate  
337 thoroughly, Fe(III) was measured for high Fe CW mesocosm [ $\sim 2.9$  g Fe(III) / kg dry soil] and  
338 low Fe CW mesocosm [ $\sim 1.7$  g Fe(III) / kg dry soil] substrates. Since the wetland sediments and  
339 peat moss both had some Fe, even the CW that was not augmented with ferrihydrite had Fe. As  
340 ferrihydrite is amorphous and highly bioavailable, the Fe(III) source for A6 would mostly come  
341 from the ferrihydrite added in the CW substrate. Examination of several Fe(III) sources as the  
342 electron acceptor for A6 showed that this ferrihydrite yielded the highest Feammox activity  
343 among the Fe(III) sources studied (10).

344 To inoculate the CW substrate with A6, 250 mL of an A6 enrichment culture ( $10^9 - 10^{10}$   
345 CFU/g sludge, 70% A6 in biomass) was added to the CW substrate for each column. The  
346 substrate was then thoroughly mixed prior to loading into the mesocosm columns.

347 Each mesocosm was planted with four *Scirpus actus* plants (bulrush), obtained from  
348 Pinelands Nursery and Supplies, Columbus, NJ, USA.



## 349 CW mesocosm operation

350 A half-strength modified Hoagland nutrient solution (41) with a high  $\text{NH}_4^+$  concentration  
351 (100 mg/L  $\text{NH}_4^+\text{-N}$ ) was pumped into the mesocosms at a flow rate of ~1.5 L/day. Before  
352 pumping into the CW mesocosms, the nutrient solution was mixed with 1 M acetic acid to  
353 increase the dissolved organic carbon and aid in the removal of the dissolved oxygen as well as  
354 lower the pH of the nutrient solution as the Feammox process requires acidic conditions (30).  
355 Each liter of half-strength modified Hoagland nutrient solution contained 6.64 mL 1 M  $\text{NH}_4\text{Cl}$ ,  
356 0.5 mL 1 M  $\text{NH}_4\text{H}_2\text{PO}_4$ , 3.0 mL 0.5 M  $\text{K}_2\text{SO}_4$ , 2.0 mL 1 M  $\text{CaCl}_2$ , 1.0 mL 1M  $\text{MgSO}_4$ , 0.5 mL  
357 micronutrient stock solution and 0.125 mL iron stock solution. The micronutrient stock was  
358 made by dissolving 2.86 g  $\text{H}_3\text{BO}_3$ , 1.81 g  $\text{MnCl}_2\cdot 4\text{H}_2\text{O}$ , 0.22 g  $\text{ZnSO}_4\cdot 7\text{H}_2\text{O}$ , 0.08 g  
359  $\text{CuSO}_4\cdot 5\text{H}_2\text{O}$  and 0.02 g  $\text{H}_2\text{MoO}_4\cdot \text{H}_2\text{O}$  in 1 L of deionized water. The iron stock solution was  
360 made by adding 500 mL 49.8 g/L  $\text{FeSO}_4\cdot 7\text{H}_2\text{O}$  solution slowly to the potassium EDTA solution  
361 (26.1 g EDTA in 286 mL water with 19 g KOH), aerating the mixture overnight while stirring  
362 and making the final volume 1 L.

363 The mesocosms and pumps were placed in a growth chamber that is simulating the summer  
364 climate of New Jersey (Table S2). Since the A6 enrichment culture was blended in open-air with  
365 the CW substrate and the CW mesocosm conditions were rather oxidized at the beginning of  
366 their operation, it was uncertain that a viable A6 population did get established in the mesocosms.  
367 Therefore, after four months of operation, when the mesocosm became more reduced, another  
368 A6 enrichment culture ( $\sim 10^7$  A6 count/mL culture, 250 mL per CW mesocosm) was injected  
369 from the bottom into each CW on day 124 to ascertain the colonization of A6 in the mesocosms.  
370 This procedure also allowed to determine if a spike in A6 numbers would result in an increase in  
371 electrical current.

## 372 **CW mesocosm sampling and dismantlement**

373       Oxidation-reduction potential (ORP) in the CWs was measured by taking water samples  
374 from sampling ports and collecting effluents from the top of the CWs. At the end of the  
375 experiment, the CW mesocosms were dismantled and soil samples were taken for analysis of  
376 microbial communities. Soil samples were collected at depths bracketing the sampling ports (6 –  
377 9 cm, 12 – 15 cm, 18 – 21 cm, 24 – 27 cm, 30 – 33 cm) as well as at the top layer of soil (0 – 3  
378 cm). For each depth, a 1 – 1.5 g wet soil sample was collected and frozen at -20 °C before  
379 proceeding with the DNA extraction. Electrodes installed in the CW mesocosms were removed  
380 carefully and biofilm samples from the electrodes were obtained using the same procedure as  
381 described above (see Supplemental Materials, Table S1. B for details). Since soil and electrode  
382 sampling requires sacrificing the mesocosms, no soil samples were collected during the  
383 operation of the CW mesocosms. Samples obtained from the CW mesocosm sediments and  
384 electrodes are enumerated in Table 3.

## 385 **DNA extraction, *Acidimicrobiaceae* bacterium A6 quantification and phylogenetic analysis**

386       Total genomic DNA was extracted from each biofilm sample obtained in duplicate from a  
387 half face or full face of each electrode deployed in the field, except for the deep electrode of set 6,  
388 which was only partially recovered and only one sample could be obtained from all faces. Since  
389 many electrodes in the CWs had a much lower biofilm mass than the filed electrodes, only one  
390 sample was recovered for DNA extraction from the CW electrodes. DNA was also extracted  
391 from each soil sample as described above (Table S1). Extractions were done using the  
392 FastDNA® spin kit for soil (MP Biomedicals, USA) according to the manufacturer's instructions.

393 Total DNA was eluted in 100 µl of sterile water and its concentrations were measured using  
394 Qubit 2.0® (Invitrogen, USA). All DNA samples were preserved at -20 °C until further analysis.

395 Bacteria quantification was carried out via Quantitative PCR (qPCR) using the Applied  
396 Biosystems StepOnePlus™ Real Time PCR system. A6 quantification was done by amplifying a  
397 section of the 16s rRNA gene between the variable regions V1 and V4 using primer set  
398 33F/232R (33F: 5'-GGCGGCGTGCTTAACACAT-3' / 232R: 5'-  
399 GAGCCCGTCCCAGAGTGATA-3'). *Geobacter* spp., an electrogenic bacteria known for its  
400 ability colonize electrodes, were quantified by amplifying a region of the 16s rRNA gene using  
401 primer set 561F/825R (561F: 5'-GCGTGTAGGCGGTTTCTTAA-3' / 825R:  
402 5'-ATCTACGGATTTCACTCCTACA-3').

403 Each qPCR mixture (20 µL) was composed of 10 µL of SYBR Premix Ex Taq® II 2X  
404 (Takara, Japan), 0.8 µL of each forward and reverse 10 µM primer, and DNA template. Thermal  
405 cycling conditions were initiated for 30 s at 95 °C, followed by 40 cycles with varying times and  
406 temperature depending on the amplicon being generated, and ended with a melting curve  
407 analysis for SYBR Green assay used to distinguish the targeted PCR product from the non-  
408 targeted PCR products. For A6 amplification, the cycling consisted of 10 s at 95 °C, 15 s of  
409 annealing at 59 °C and 15 s at 72 °C. For total bacteria quantification, each cycle consisted of 5 s  
410 at 94 °C, 30 s at 55 °C and 30 s at 70 °C. Each qPCR reaction was run in duplicate or triplicate  
411 per sample and included negative controls and a standard curve; the last one consisting of serial  
412 dilutions of known numbers of copies of DNA of the gene per volume. Finally, the results were  
413 converted into copies of DNA / m<sup>2</sup> by dividing the total gene copies obtained from qPCR by the  
414 surface area of sediments for soil samples or by the surface area of the electrode for the electrode  
415 biofilm samples.

416 In order to determine the microbial community composition and abundance in the sediments  
417 (field and CW) and compare it to that formed on the electrodes, sequencing and phylogenetic  
418 analysis was performed by Novogene (Beijing, China) as follows: From total genomic DNA, the  
419 variable region V4 of the 16s rRNA gene was amplified using the primer set 515F/806R (515 F:  
420 5'-GTGCCAGCMGCCGCGGTAA-3' / 806R: 5'-GGACTACHVGGGTWTCTAAT-3') with a  
421 barcode following the method of Caporaso *et al* (2011) . All PCR reactions were carried out with  
422 Phusion® High-Fidelity PCR master mix (New England Biolabs). PCR products quantification  
423 and qualification were determined by electrophoresis on 2% agarose gel. The resulting  
424 amplicons were pooled, purified, quantified. Sequencing libraries were generated using TruSeq®  
425 DNA PCR-free sample preparation kit (Illumina, USA) following the manufacturer's protocol  
426 and index codes were added. The library quality was assessed on the Qubit® 2.0 Fluorometer  
427 (Thermo Scientific) and Agilent Bioanalyzer 2100 system. Finally, sequencing was performed  
428 on an IlluminaHiSeq2500 platform and 250 bp paired-end reads were generated.

429 Paired-end reads were assembled by using FLASH V.1.2.7 (43). Raw reads were processed  
430 according to QIIME V1.7.0 quality controlled process (44) and chimeric sequences were filtered  
431 out using UCHIME algorithm (45). For all samples (field and CW) a minimum of 25,000  
432 sequences were obtained. These resulting sequences were clustered into operational taxonomic  
433 units (OTUs) using Uparse V7.0.1001 (46). Sequences with  $\geq 97\%$  similarity were assigned to  
434 the same OTUs. A total of 3206 OTUs were produced across all field samples and 2870 OTUs  
435 were produced across all CW mesocosm samples, with a range between 1422-1794 OTUs per  
436 field sample and 674 – 1481 OTUs per mesocosm sample. A representative sequence for each  
437 OTU was screened for taxonomic annotation using the Ribosomal Database Project (RDP)  
438 Classifier (47, 48) using GreenGene database(49) at a minimum of 80% confidence threshold for

439 all OTUs. For CW samples, the OTUs were screened for taxonomic annotation applying the  
440 blastn algorithm against the 2016 NCBI's 16s ribosomal RNA sequences for bacteria and  
441 archaea at an e-value of  $1e^{-5}$ . A6's 16s rRNA gene sequence was included to NCBI's database  
442 for annotation at the family and genus level of the top 100 and 300 most abundant OTUs. Finally,  
443 samples were standardized using the least sequence number obtained from all samples so that the  
444 same number of sequences were used for calculating the relative abundance of OTUs.

#### 445 **Soil surface area analysis**

446 Nitrogen sorption was used to determine the surface area of the soil samples taken from the  
447 field (Table 2) and the CW (Table 3). Prior to the analysis, samples were oven-dried at 56°C until  
448 the mass stabilized. Subsequently, the samples were degassed at 60°C and 0.1 mmHg using a  
449 Smart Micrometrics VacPrep (Norcross, GA, USA). The nitrogen sorption measurements were  
450 conducted using a Micromeritics 3FLEX (Norcross, GA, USA), using the BET method  
451 (Brunauer–Emmett–Teller) to calculate the surface area of the soil. The measurements obtained  
452 were used to normalize the bacterial count data by surface area.

#### 453 **Analytical Methods**

454 The sediment's iron concentrations were analyzed using the ferrozine method (50). Briefly,  
455 0.5 mL sediment sample was added to 9.5 mL 0.5 M HCl and shaken for 24 hours at room  
456 temperature to extract Fe(II). In total, 60  $\mu$ L 6.25 M  $\text{NH}_2\text{OH}\cdot\text{HCl}$  was added to 3 mL of  
457 extraction solution and shaken for 24 hours at room temperature to reduce Fe(III) to Fe(II). For  
458 the chromogenic reaction, 60  $\mu$ L of extraction solution was added to 3 mL 1 g/L ferrozine  
459 solution (pH 7.0) and reacted for 30 minutes. The concentrations of Fe(II) and total Fe were  
460 measured by reading the absorbance at the 562-nm wavelength using a Spectronic® Genesys™ 2

461 instrument, and the Fe(III) concentration was calculated from the difference. Oxidation-reduction  
462 potential (ORP) at different depths of CW mesocosms were measured using probes from Thermo  
463 Scientific, Inc. During the operation of CW mesocosms, electrode pairs were only connected  
464 using wires, whereas 1000- $\Omega$  resistors were connected in the circuit for voltage measurement.  
465 The voltages between electrode pairs in the CW mesocosms were measured using a multimeter  
466 and currents were calculated accordingly.

#### 467 **Statistical Analysis.**

468 The Welch t-test statistical analysis was used to determine if there were statistical  
469 differences in bacterial counts per surface area between electrode and soil samples in the field  
470 and CW mesocosm experiments. Paired two sample t-tests were conducted to determine if there  
471 were statistical differences in relative abundance for electrode/soil pairs in the CW mesocosms.

#### 472 **ACKNOWLEDGEMENTS**

473 Funding for this research were provided by the Program of International S&T Cooperation,  
474 National Key Research and Development Program of China (2016YFE0106600). The Instituto  
475 de Fomento al Talento Humano – Ecuador and the Mary and Randall Hack '69 Research Grant  
476 provided funding for Melany Ruiz-Urigüen. We thank Dr. Claire White and Dr. Nishant Garg for  
477 their collaboration in soil surface area analysis.

478 **REFERENCES**

- 479 1. Lovley DR. 2008. The microbe electric: conversion of organic matter to electricity.  
480 *Current Opinion in Biotechnology* 19:564-571.
- 481 2. Logan BE. 2009. Exoelectrogenic bacteria that power microbial fuel cells. *Nature*  
482 *Reviews-Microbiology* 7:375-381.
- 483 3. Jung S, Regan JM. 2007. Comparison of anode bacterial communities and performance  
484 in microbial fuel cells with different electron donors. *Appl Microbiol Biotechnol* 77:393-  
485 402.
- 486 4. Williams KH, Nevin KP, Franks A, Englert A, Long PE, Lovley DR. 2010. Electrode-  
487 based approach for monitoring in situ microbial activity during subsurface  
488 bioremediation. *Environ Sci Technol* 44:47-54.
- 489 5. Nevin KP, Lovley DR. 2000. Potential for Nonenzymatic Reduction of Fe(III) via  
490 Eletron Shuttling in Subsurface Sediments. *Environmental Science and Technology*  
491 34:2472-2478.
- 492 6. Huang S, Jaffé P. 2013. H – Goldschmidt Abstracts 2013, abstr *Mineralogical Magazine*,
- 493 7. Huang S, Jaffé PR. 2015. Characterization of incubation experiments and development of  
494 an enrichment culture capable of ammonium oxidation under iron-reducing conditions.  
495 *Biogeosciences* 12:769-779.
- 496 8. Clement JC, Shrestha J, Ehrenfeld JG, Jaffe PR. 2005. Ammonium oxidation coupled to  
497 dissimilatory reduction of iron under anaerobic conditions in wetland soils. *Soil Biology*  
498 *& Biochemistry* 37:2323-2328.
- 499 9. Sawayama S. 2006. Possibility of anoxic ferric ammonium oxidation. *J Biosci Bioeng*  
500 101:70-2.

- 501 10. Huang S, Jaffé PR. 2018. Isolation and characterization of an ammonium-oxidizing iron  
502 reducer: Acidimicrobiaceae sp. A6. PLoS One 13:e0194007.
- 503 11. Gilson ER, Huang S, Jaffe PR. 2015. Biological reduction of uranium coupled with  
504 oxidation of ammonium by Acidimicrobiaceae bacterium A6 under iron reducing  
505 conditions. Biodegradation 26:475-82.
- 506 12. Lu L, Xing D, Ren ZJ. 2015. Microbial community structure accompanied with  
507 electricity production in a constructed wetland plant microbial fuel cell. Bioresour  
508 Technol 195:115-21.
- 509 13. Zhu X, Yates MD, Hatzell MC, Ananda Rao H, Saikaly PE, Logan BE. 2014. Microbial  
510 community composition is unaffected by anode potential. Environ Sci Technol 48:1352-8.
- 511 14. Hari AR, Katuri KP, Logan BE, Saikaly PE. 2016. Set anode potentials affect the  
512 electron fluxes and microbial community structure in propionate-fed microbial  
513 electrolysis cells. Sci Rep 6:38690.
- 514 15. Lu L, Xing D, Ren N. 2012. Pyrosequencing reveals highly diverse microbial  
515 communities in microbial electrolysis cells involved in enhanced H<sub>2</sub> production from  
516 waste activated sludge. Water Res 46:2425-34.
- 517 16. Wang N, Chen Z, Li H-B, Su J-Q, Zhao F, Zhu Y-G. 2015. Bacterial community  
518 composition at anodes of microbial fuel cells for paddy soils: the effects of soil properties.  
519 Journal of Soils and Sediments 15:926-936.
- 520 17. Wrighton KC, Virdis B, Clauwaert P, Read ST, Daly RA, Boon N, Piceno Y, Andersen  
521 GL, Coates JD, Rabaey K. 2010. Bacterial community structure corresponds to  
522 performance during cathodic nitrate reduction. ISME J 4:1443-55.



- 523 18. Sacco NJ, Bonetto MC, Corton E. 2017. Isolation and Characterization of a Novel  
524 Electrogenic Bacterium, *Dietzia* sp. RNV-4. *PLoS One* 12:e0169955.
- 525 19. Rabaey K, Rozendal RA. 2010. Microbial electrosynthesis - revisiting the electrical route  
526 for microbial production. *Nat Rev Microbiol* 8:706-16.
- 527 20. Semenc L, E Franks A. 2015. Delving through electrogenic biofilms: from anodes to  
528 cathodes to microbes. *AIMS Bioengineering* 2:222-248.
- 529 21. Rabaey K, Read ST, Clauwaert P, Freguia S, Bond PL, Blackall LL, Keller J. 2008.  
530 Cathodic oxygen reduction catalyzed by bacteria in microbial fuel cells. *ISME J* 2:519-27.
- 531 22. Gregory KB, Bond DR, Lovley DR. 2004. Graphite electrodes as electron donors for  
532 anaerobic respiration. *Environ Microbiol* 6:596-604.
- 533 23. Fang Z, Song HL, Cang N, Li XN. 2013. Performance of microbial fuel cell coupled  
534 constructed wetland system for decolorization of azo dye and bioelectricity generation.  
535 *Bioresource Technology* 144:165-171.
- 536 24. Oon YL, Ong SA, Ho LN, Wong YS, Oon YS, Lehl HK, Thung WE. 2015. Hybrid  
537 system up-flow constructed wetland integrated with microbial fuel cell for simultaneous  
538 wastewater treatment and electricity generation. *Bioresource Technology* 186:270-275.
- 539 25. Chen Z, Huang YC, Liang JH, Zhao F, Zhu YG. 2012. A novel sediment microbial fuel  
540 cell with a biocathode in the rice rhizosphere. *Bioresource Technology* 108:55-59.
- 541 26. Yadav AK, Dash P, Mohanty A, Abbassi R, Mishra BK. 2012. Performance assessment  
542 of innovative constructed wetland-microbial fuel cell for electricity production and dye  
543 removal. *Ecological Engineering* 47:126-131.
- 544 27. Yang WH, Weber KA, Silver WL. 2012. Nitrogen loss from soil through anaerobic  
545 ammonium oxidation coupled to iron reduction. *Nature Geoscience* 5:538-541.

- 546 28. Ding LJ, An XL, Li S, Zhang GL, Zhu YG. 2014. Nitrogen Loss through Anaerobic  
547 Ammonium Oxidation Coupled to Iron Reduction from Paddy Soils in a Chronosequence.  
548 Environmental Science & Technology 48:10641-10647.
- 549 29. Li XF, Hou LJ, Liu M, Zheng YL, Yin GY, Lin XB, Cheng L, Li Y, Hu XT. 2015.  
550 Evidence of Nitrogen Loss from Anaerobic Ammonium Oxidation Coupled with Ferric  
551 Iron Reduction in an Intertidal Wetland. Environmental Science & Technology  
552 49:11560-11568.
- 553 30. Huang S, Chen C, Peng XC, Jaffe PR. 2016. Environmental factors affecting the presence  
554 of Acidimicrobiaceae and ammonium removal under iron-reducing conditions in soil  
555 environments. Soil Biology & Biochemistry 98:148-158.
- 556 31. Ahn JH, Jeong WS, Choi MY, Kim BY, Song J, Weon HY. 2014. Phylogenetic diversity  
557 of dominant bacterial and archaeal communities in plant-microbial fuel cells using rice  
558 plants. J Microbiol Biotechnol 24:1707-18.
- 559 32. Holmes DE, Bond DR, O'Neil RA, Reimers CE, Tender LR, Lovley DR. 2004. Microbial  
560 communities associated with electrodes harvesting electricity from a variety of aquatic  
561 sediments. Microb Ecol 48:178-90.
- 562 33. Weiss JV, Rentz JA, Plaia T, Neubauer SC, Merrill-Floyd M, Lilburn T, Bradburne C,  
563 Megonigal JP, Emerson D. 2007. Characterization of Neutrophilic Fe(II)-Oxidizing  
564 Bacteria Isolated from the Rhizosphere of Wetland Plants and Description  
565 of *Ferritrophicum radicolagen. nov. sp. nov.*, and *Sideroxydans paludicolasp. nov.*  
566 Geomicrobiology Journal 24:559-570.
- 567 34. Bond DR, Lovley DR. 2005. Evidence for involvement of an electron shuttle in  
568 electricity generation by *Geothrix fermentans*. Appl Environ Microbiol 71:2186-9.

- 569 35. Mahidhara G, Chintalapati VR. 2016. Eco-physiological and interdisciplinary approaches  
570 for empowering biobatteries. *Annals of Microbiology* 66:543-557.
- 571 36. Toczyłowska-Maminska R, Szymona K, Madej H, Wong WZ, Bala A, Brutkowski W,  
572 Krajewski K, H'ng PS, Maminski M. 2015. Cellulolytic and electrogenic activity of  
573 *Enterobacter cloacae* in mediatorless microbial fuel cell. *Applied Energy* 160:88-93.
- 574 37. Liu R, Tursun H, Hou XS, Odey F, Li Y, Wang XH, Xie T. 2017. Microbial community  
575 dynamics in a pilot-scale MFC-AA/O system treating domestic sewage. *Bioresource*  
576 *Technology* 241:439-447.
- 577 38. Call DF, Logan BE. 2011. A method for high throughput bioelectrochemical research  
578 based on small scale microbial electrolysis cells. *Biosens Bioelectron* 26:4526-31.
- 579 39. Shrestha J, Rich JJ, Ehrenfeld JG, Jaffe PR. 2009. Oxidation of Ammonium to Nitrite  
580 Under Iron-Reducing Conditions in Wetland Soils. *Soil Science* 174:156-164.
- 581 40. Schwertmann U, Cornell RM. 2000. *Iron Oxides in the Laboratory: Preparation and*  
582 *Characterization*. Wiley-VCH.
- 583 41. Hoagland DR, Arnon DI. 1950. The Water-culture Method for Growing Plants without  
584 Soil. *Circular California agricultural experiment station* 347:32.
- 585 42. Caporaso JG, Lauber CL, Walters WA, Berg-Lyons D, Lozupone CA, Turnbaugh PJ,  
586 Fierer N, Knight R. 2011. Global patterns of 16S rRNA diversity at a depth of millions of  
587 sequences per sample. *Proc Natl Acad Sci U S A* 108 Suppl 1:4516-22.
- 588 43. Magoc T, Salzberg SL. 2011. FLASH: fast length adjustment of short reads to improve  
589 genome assemblies. *Bioinformatics* 27:2957-63.
- 590 44. Caporaso JG, Kuczynski J, Stombaugh J, Bittinger K, Bushman FD, Costello EK, Fierer  
591 N, Pena AG, Goodrich JK, Gordon JI, Huttley GA, Kelley ST, Knights D, Koenig JE,

- 592 Ley RE, Lozupone CA, McDonald D, Muegge BD, Pirrung M, Reeder J, Sevinsky JR,  
593 Turnbaugh PJ, Walters WA, Widmann J, Yatsunenko T, Zaneveld J, Knight R. 2010.  
594 QIIME allows analysis of high-throughput community sequencing data. *Nat Methods*  
595 7:335-6.
- 596 45. Edgar RC, Haas BJ, Clemente JC, Quince C, Knight R. 2011. UCHIME improves  
597 sensitivity and speed of chimera detection. *Bioinformatics* 27:2194-200.
- 598 46. Edgar RC. 2013. UPARSE: highly accurate OTU sequences from microbial amplicon  
599 reads. *Nat Methods* 10:996-8.
- 600 47. Wang Q, Garrity GM, Tiedje JM, Cole JR. 2007. Naive Bayesian classifier for rapid  
601 assignment of rRNA sequences into the new bacterial taxonomy. *Appl Environ Microbiol*  
602 73:5261-7.
- 603 48. Cole JR, Wang Q, Fish JA, Chai B, McGarrell DM, Sun Y, Brown CT, Porras-Alfaro A,  
604 Kuske CR, Tiedje JM. 2014. Ribosomal Database Project: data and tools for high  
605 throughput rRNA analysis. *Nucleic Acids Res* 42:D633-42.
- 606 49. DeSantis TZ, Hugenholtz P, Larsen N, Rojas M, Brodie EL, Keller K, Huber T, Dalevi D,  
607 Hu P, Andersen GL. 2006. Greengenes, a chimera-checked 16S rRNA gene database and  
608 workbench compatible with ARB. *Appl Environ Microbiol* 72:5069-72.
- 609 50. Gibbs MM. 1979. A simple method for the rapid determination of iron in natural waters.  
610 *Water Research* 13:295-297.
- 611 51. Strycharz-Glaven SM, Glaven RH, Wang Z, Zhou J, Vora GJ, Tender LM. 2013.  
612 Electrochemical investigation of a microbial solar cell reveals a nonphotosynthetic  
613 biocathode catalyst. *Appl Environ Microbiol* 79:3933-42.  
614

615 **Table 1.** Average number of copies of DNA /m<sup>2</sup> quantified for *Acidimicrobiaceae* bacterium A6  
616 and *Geobacter* spp. from samples obtained from biofilm, soil surrounding the electrodes, and soil  
617 samples for each site.

|                | <i>Acidimicrobiaceae</i> bacterium A6 |          |          | <i>Geobacter</i> spp.        |          |          |
|----------------|---------------------------------------|----------|----------|------------------------------|----------|----------|
|                | copies of DNA/m <sup>2</sup>          |          |          | copies of DNA/m <sup>2</sup> |          |          |
|                | Biofilm                               | Soil     | Site     | Biofilm                      | Soil     | Site     |
| <b>SET 1-2</b> | 5.12E+06                              | 3.28E+01 | 1.08E+02 | 2.80E+08                     | 2.85E+04 | 2.01E+04 |
| <b>SET 3-4</b> | 1.35E+08                              | 1.93E+03 | 1.69E+02 | 1.21E+08                     | 1.07E+05 | 1.14E+04 |
| <b>SET 5-6</b> | 1.58E+07                              | 5.04E+03 | 9.17E+00 | 1.88E+07                     | 1.15E+04 | 2.58E+03 |

618 from the field sets (A) and the CW (B) sediments and electrode biofilms. \*\*\* p < 0.02, \* p < 0.1.

619 **Table 2.** Description of biofilm (Biof., sample #, depth) and soil (Soil, sample #, depth) samples  
 620 taken from the electrode pairs located at each location.

| <b>Site</b>     | <b>Electrode set and site sampled</b> | <b>Sample</b>             |                     |
|-----------------|---------------------------------------|---------------------------|---------------------|
| <b>Site 1-2</b> | Set 1                                 | Shallow electrode 1       | Biof. 1s            |
|                 |                                       |                           | Soil 1s             |
|                 |                                       | 10 cm deep electrode 1    | Biof. 1.10          |
|                 |                                       |                           | Soil 1.10           |
|                 | Set 2                                 | Shallow electrode 2       | Biof. 2s            |
|                 |                                       |                           | Soil 2s             |
|                 |                                       | 30 cm deep electrode 2    | Biof. 2.30          |
|                 |                                       |                           | Soil 2.30           |
|                 | Site 1-2                              | Soil sample from site 1-2 | Soil 1-2            |
|                 | <b>Site 3-4</b>                       | Set 3                     | Shallow electrode 3 |
|                 |                                       |                           | Soil 3s             |
|                 |                                       | 10 cm deep electrode 3    | Biof. 3.10          |
|                 |                                       |                           | Soil 3.10           |
| Set 4           |                                       | Shallow electrode 4       | Biof.4s             |
|                 |                                       |                           | Soil 4s             |
|                 |                                       | 30 cm deep electrode 4    | Biof. 4.30          |
|                 |                                       |                           | Soil 4.30           |
| Site 3-4        |                                       | Soil sample from site 3-4 | Soil 3-4            |
| <b>Site 5-6</b> |                                       | Set 5                     | Shallow electrode 5 |
|                 |                                       |                           | Soil 5s             |
|                 |                                       | 10 cm deep electrode 5    | Biof. 5.10          |
|                 |                                       |                           | Soil 5.10           |
|                 | Set 6                                 | Shallow electrode 6       | Biof. 6s            |
|                 |                                       |                           | Soil 6s             |
|                 |                                       | 30 cm deep electrode 6    | Biof. 6.30          |
|                 |                                       |                           | Soil 6.30           |
|                 | Site 5-6                              | Soil sample from site 5-6 | Soil 5-6            |

621 **Table 3.** Description of biofilm (Biof., Fe treatment, electrode #) and soil (Soil, Fe treatment,  
 622 electrode #) samples taken from the CW mesocosms.

| <b>Depth</b>      | <b>Electrode and sediment sample</b> |            | <b>Sample name</b> |
|-------------------|--------------------------------------|------------|--------------------|
| <b>0 – 3 cm</b>   | Top sediment                         | High Fe CW | Soil High Fe.0     |
|                   |                                      | Low Fe CW  | Soil Low Fe.0      |
| <b>6 – 9 cm</b>   | Electrode 1                          | High Fe CW | Soil High Fe.1     |
|                   |                                      |            | Biof. High Fe.1    |
|                   |                                      | Low Fe CW  | Soil Low Fe.1      |
|                   |                                      |            | Biof. Low Fe.1     |
| <b>12 – 15 cm</b> | Electrode 2                          | High Fe CW | Soil High Fe.2     |
|                   |                                      |            | Biof. High Fe.2    |
|                   |                                      | Low Fe CW  | Soil Low Fe.2      |
|                   |                                      |            | Biof. Low Fe.2     |
| <b>18 – 21 cm</b> | Electrode 3                          | High Fe CW | Soil High Fe.3     |
|                   |                                      |            | Biof. High Fe.3    |
|                   |                                      | Low Fe CW  | Soil Low Fe.3      |
|                   |                                      |            | Biof. Low Fe.3     |
| <b>24 – 27 cm</b> | Electrode 4                          | High Fe CW | Soil High Fe.4     |
|                   |                                      |            | Biof. High Fe.4    |
|                   |                                      | Low Fe CW  | Soil Low Fe.4      |
|                   |                                      |            | Biof. Low Fe.4     |
| <b>30 – 33 cm</b> | Electrode 5                          | High Fe CW | Soil High Fe.5     |
|                   |                                      |            | Biof. High Fe.5    |
|                   |                                      | Low Fe CW  | Soil Low Fe.5      |
|                   |                                      |            | Biof. Low Fe.5     |

623

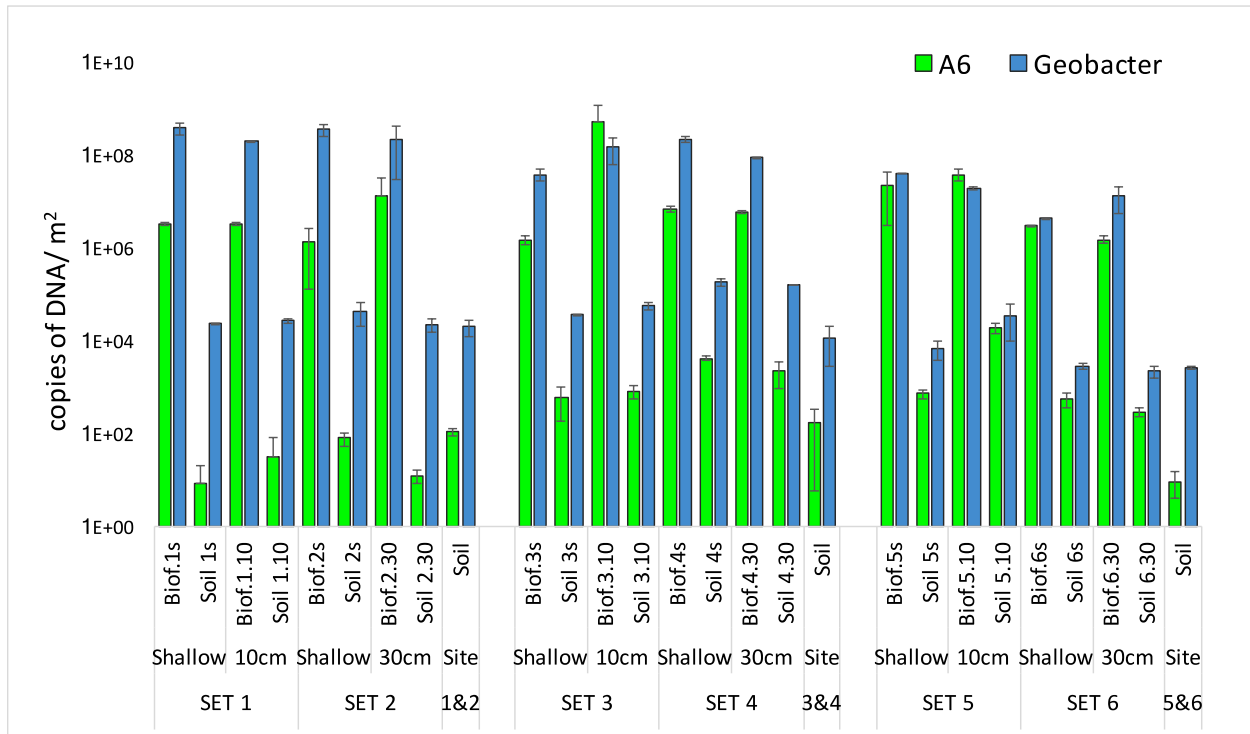

624

625 **Figure 1.** *Acidimicrobiaceae* bacterium A6 and *Geobacter* spp. quantification from biofilm  
626 formed on the electrodes and soil samples taken from 3 field electrode sets.



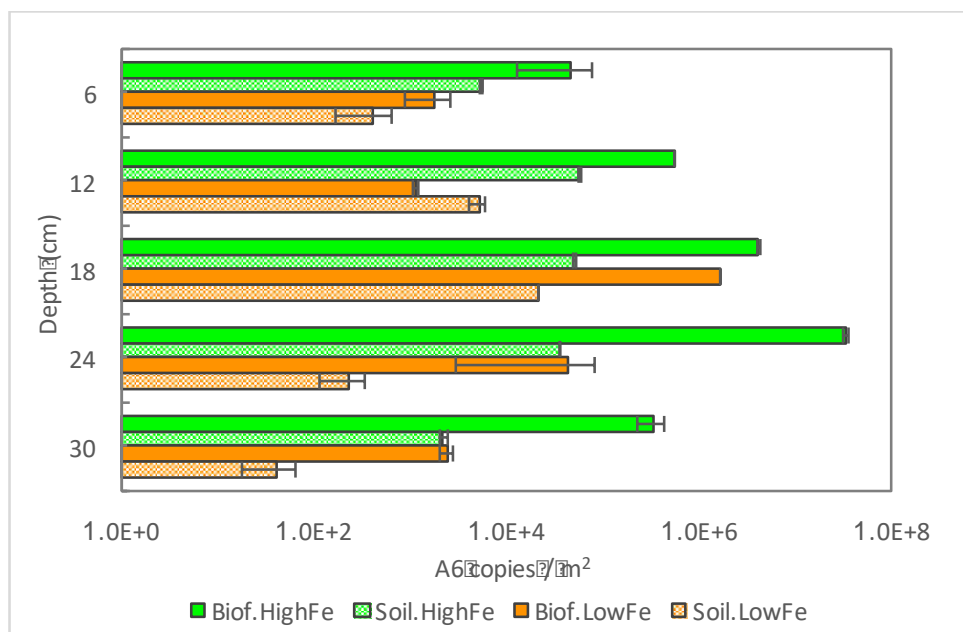

627

628 **Figure 2.** *Acidimicrobiaceae* bacterium A6 populations in the CW sediments or the electrodes  
629 in CW mesocosms. Error bars are upper and lower values of qPCR measurements.

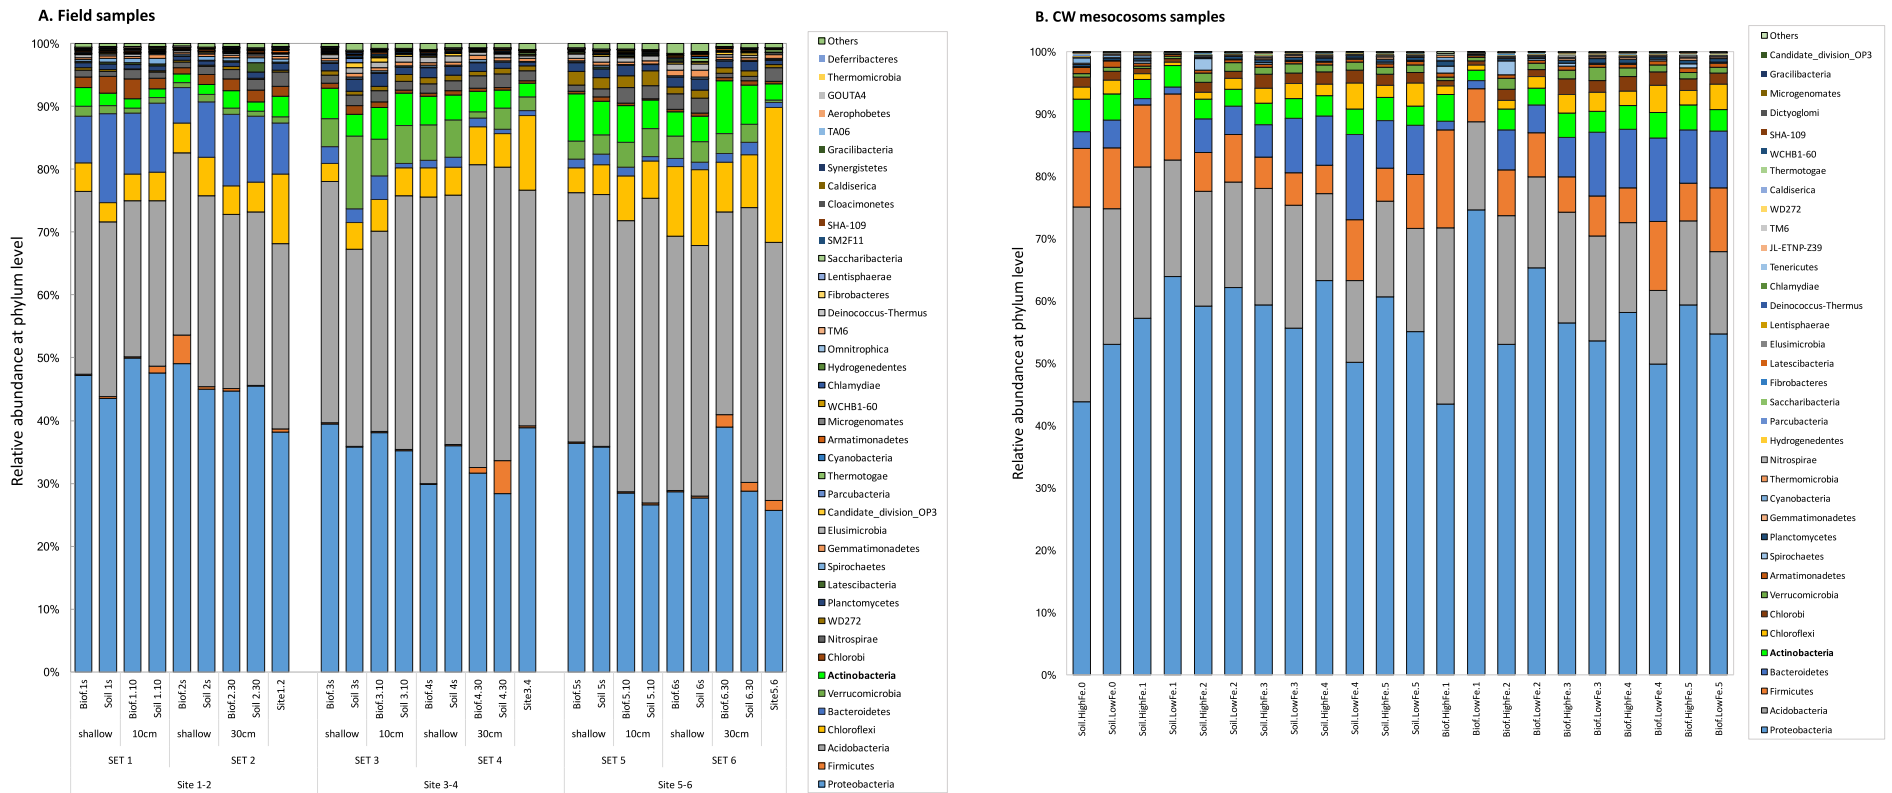

631 **Figure 3.** Microbial community composition at the phylum level of biofilm and soil samples from electrode pairs from 3 different  
 632 field locations (A) and CW mesocosms (B). Actinobacteria phylum, highlighted in yellow, to which *Acidimicrobiaceae* bacterium A6  
 633 belongs, is amongst the most abundant phyla in all samples.

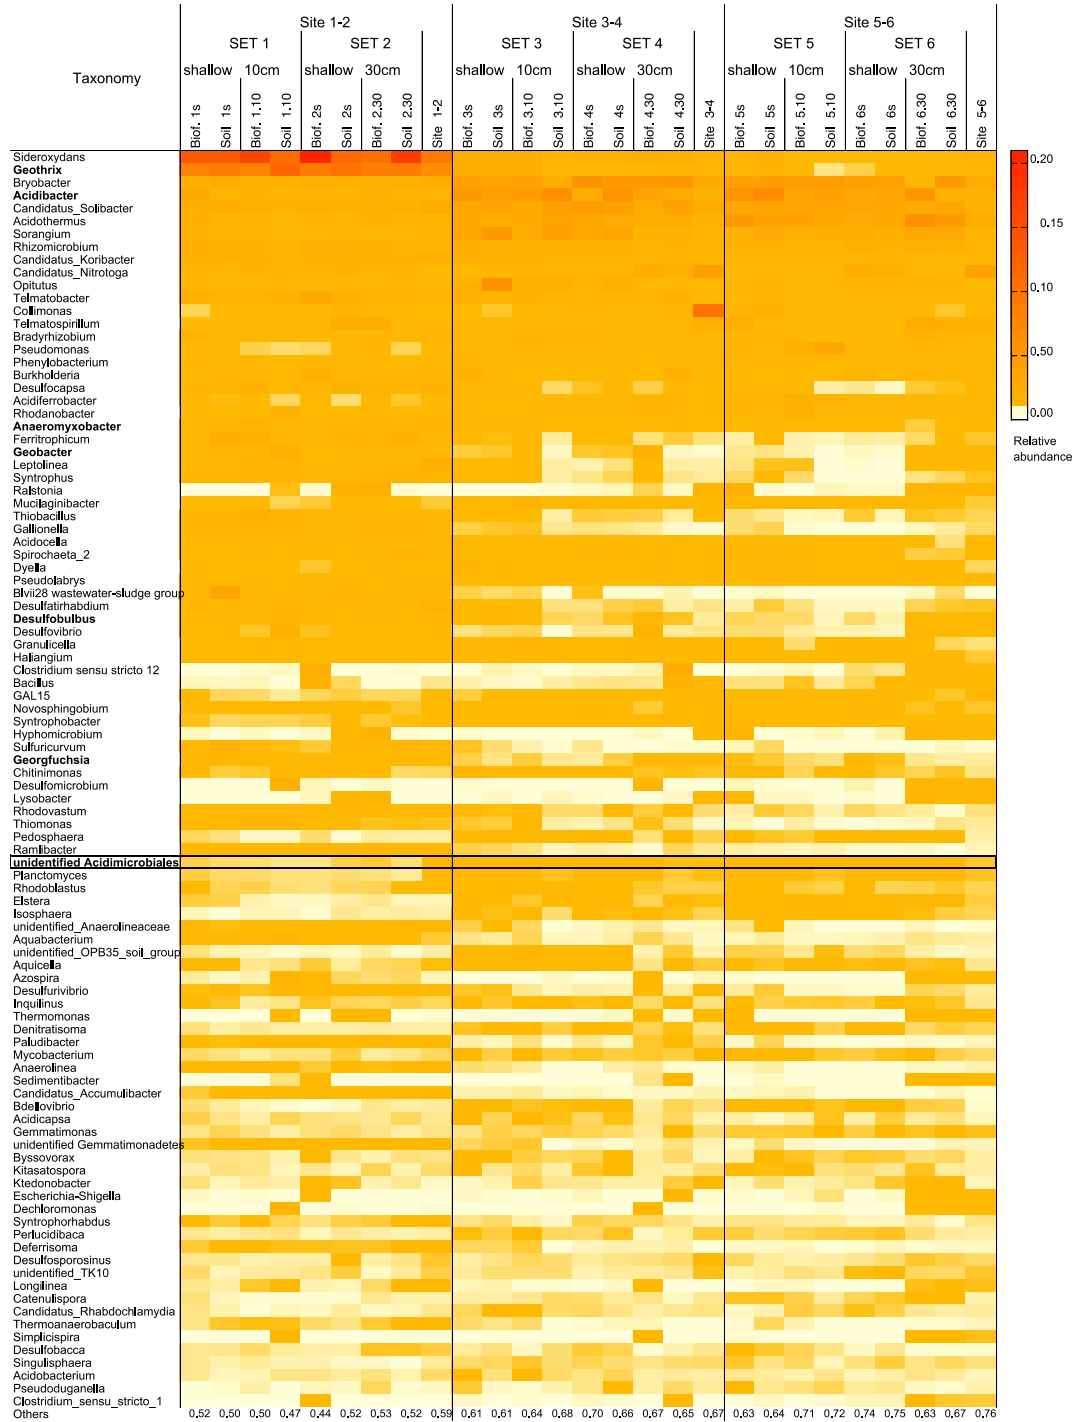

634

635 **Figure 4.** Relative abundance of the top 100 most abundant genera in biofilm and soil samples

636 from the electrode sets placed in the field. *Acidimicrobiaceae* bacterium A6 had 97% identity

637 with the *unidentified\_Acidimicrobiales* which ranked 56<sup>th</sup> in abundance. In bold other Fe-

638 reducing bacteria.

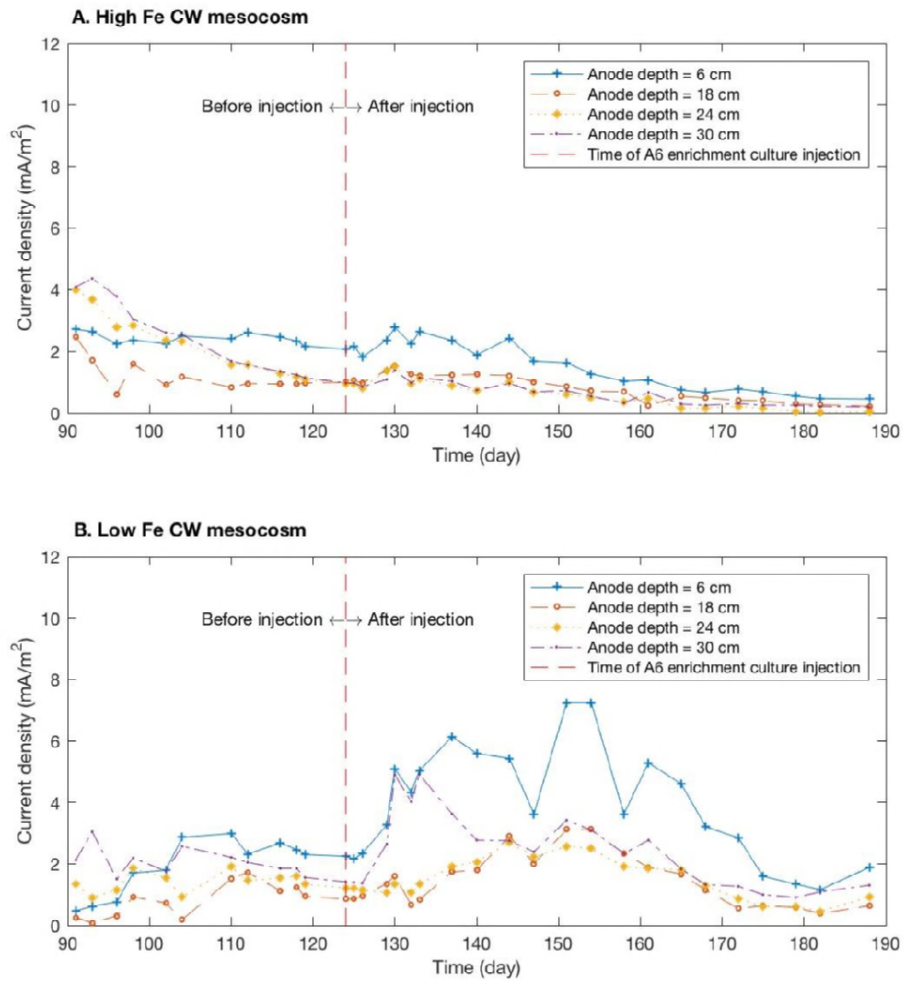

639

640 **Figure 5.** Current density profiles for high Fe CW mesocosm (A) and low Fe CW mesocosm (B)  
641 one month before and three months after the injection of the A6 enrichment culture. Because of  
642 the ORP development, the second electrodes (at depth 12 cm) had the highest redox potential  
643 when A6 enrichment culture was injected. Therefore, the electrodes at depth 12 cm in both CW  
644 mesocosms were connected as cathodes. The currents were measured for electrode pairs with  
645 different anode depths.

646

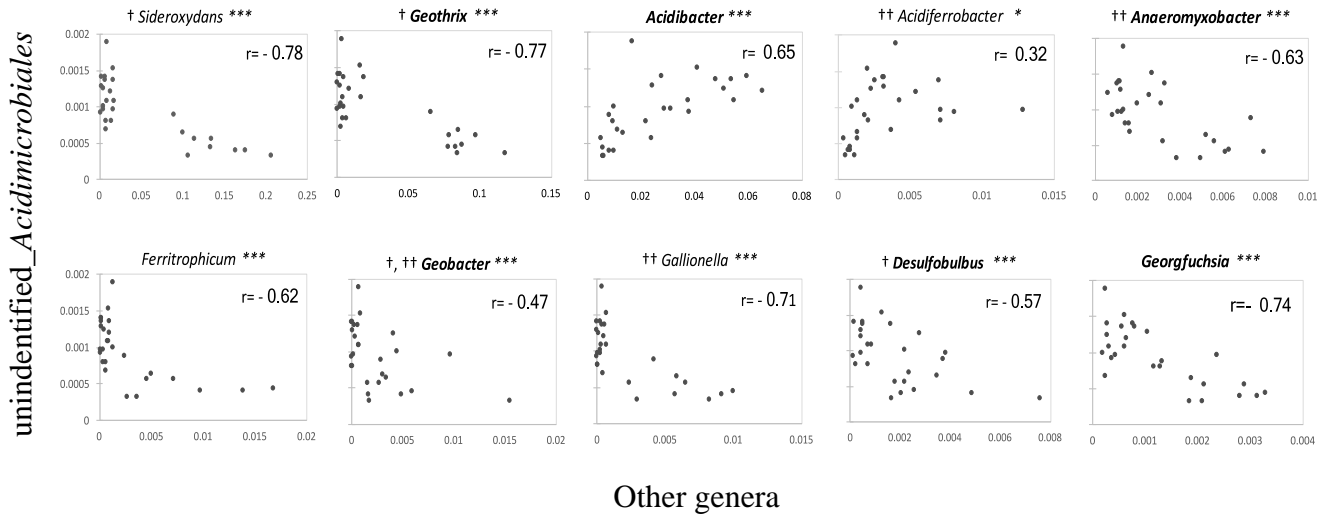

647

648 **Figure 6.** Correlation of the relative abundance between *Acidimicrobiaceae* bacterium A6  
649 (unidentifed\_Adicimicrobiales) and Fe-cycling bacteria in biofilm and soil samples (n=27). Fe-  
650 oxidizing bacteria are in italics and Fe-reducing bacteria in bold italics. † Anode colonizer (22,  
651 31, 34, 51), †† Cathode colonizer (31). \*\*\* p < 0.01, \* p < 0.1.

652

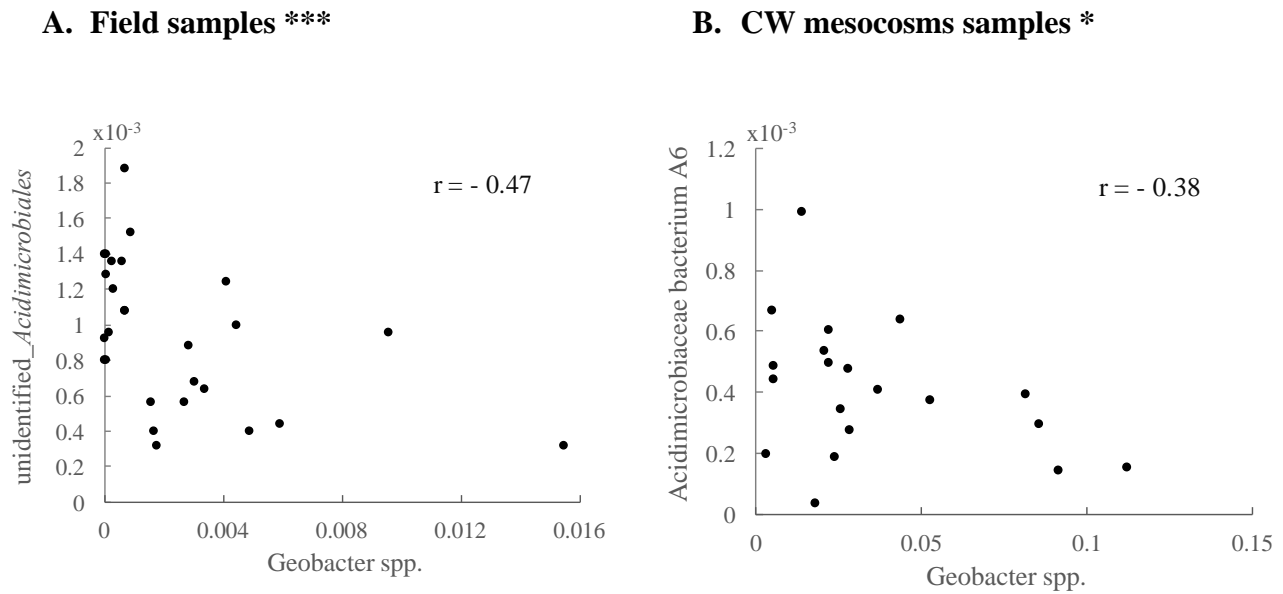

653 **Figure 7.** Correlation between Feammox bacteria and *Geobacter* spp. relative abundance. Data  
654 from the field sets (A) and the CW (B) sediments and electrode biofilms. \*\*\*  $p < 0.02$ , \*  $p < 0.1$ .

655

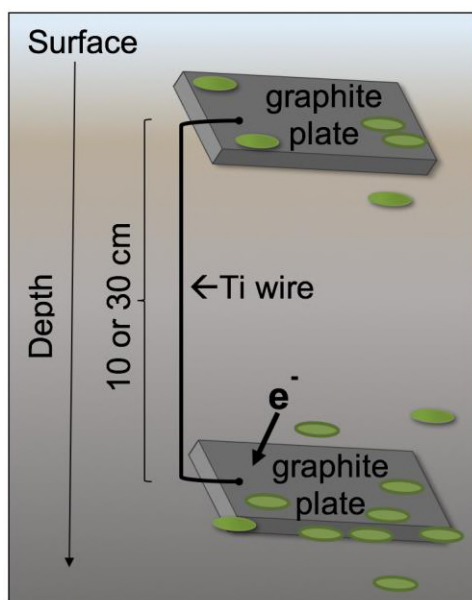

656

657

**Figure 8.** Schematic of an electrodes pair.

658

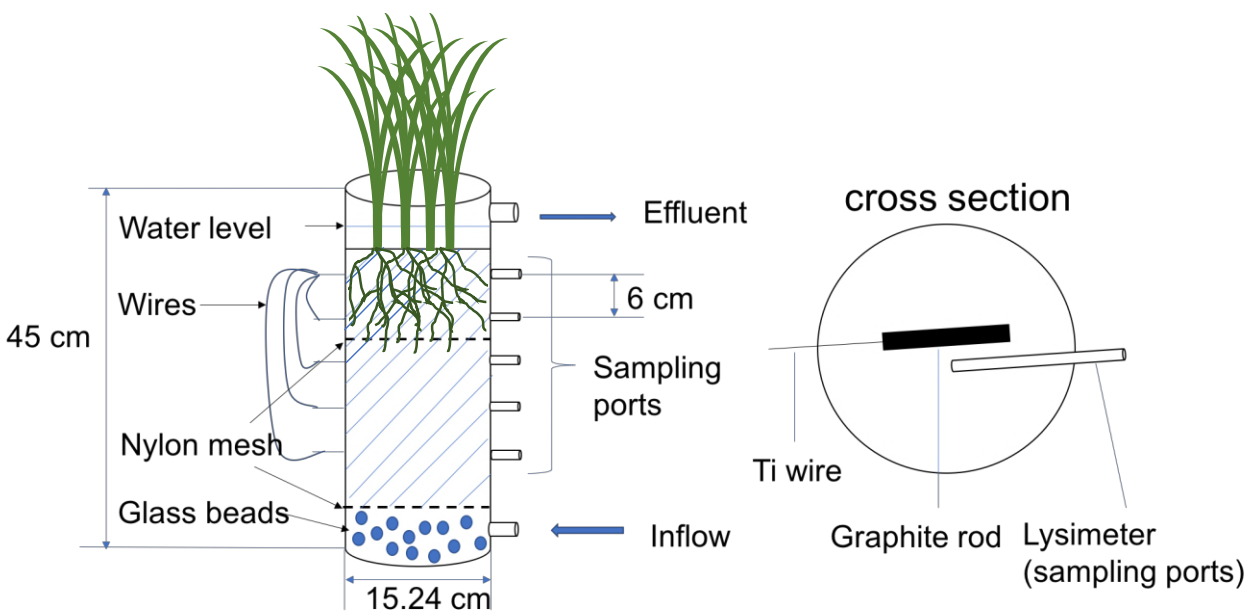

659

660

**Figure 1.** Schematic of a CW mesocosm and electrode setup.
